# Supplementary material for: Comparison of metabolomic reconfiguration between Columbia and Landsberg ecotypes subjected to the combination of high salinity and increased irradiance
Source: Springer Nature journal article supplement (doi:10.1186/s12870-023-04404-7), 2023-08-25
Supplement: MOESM1 [file 12870_2023_4404_MOESM1_ESM.pdf]

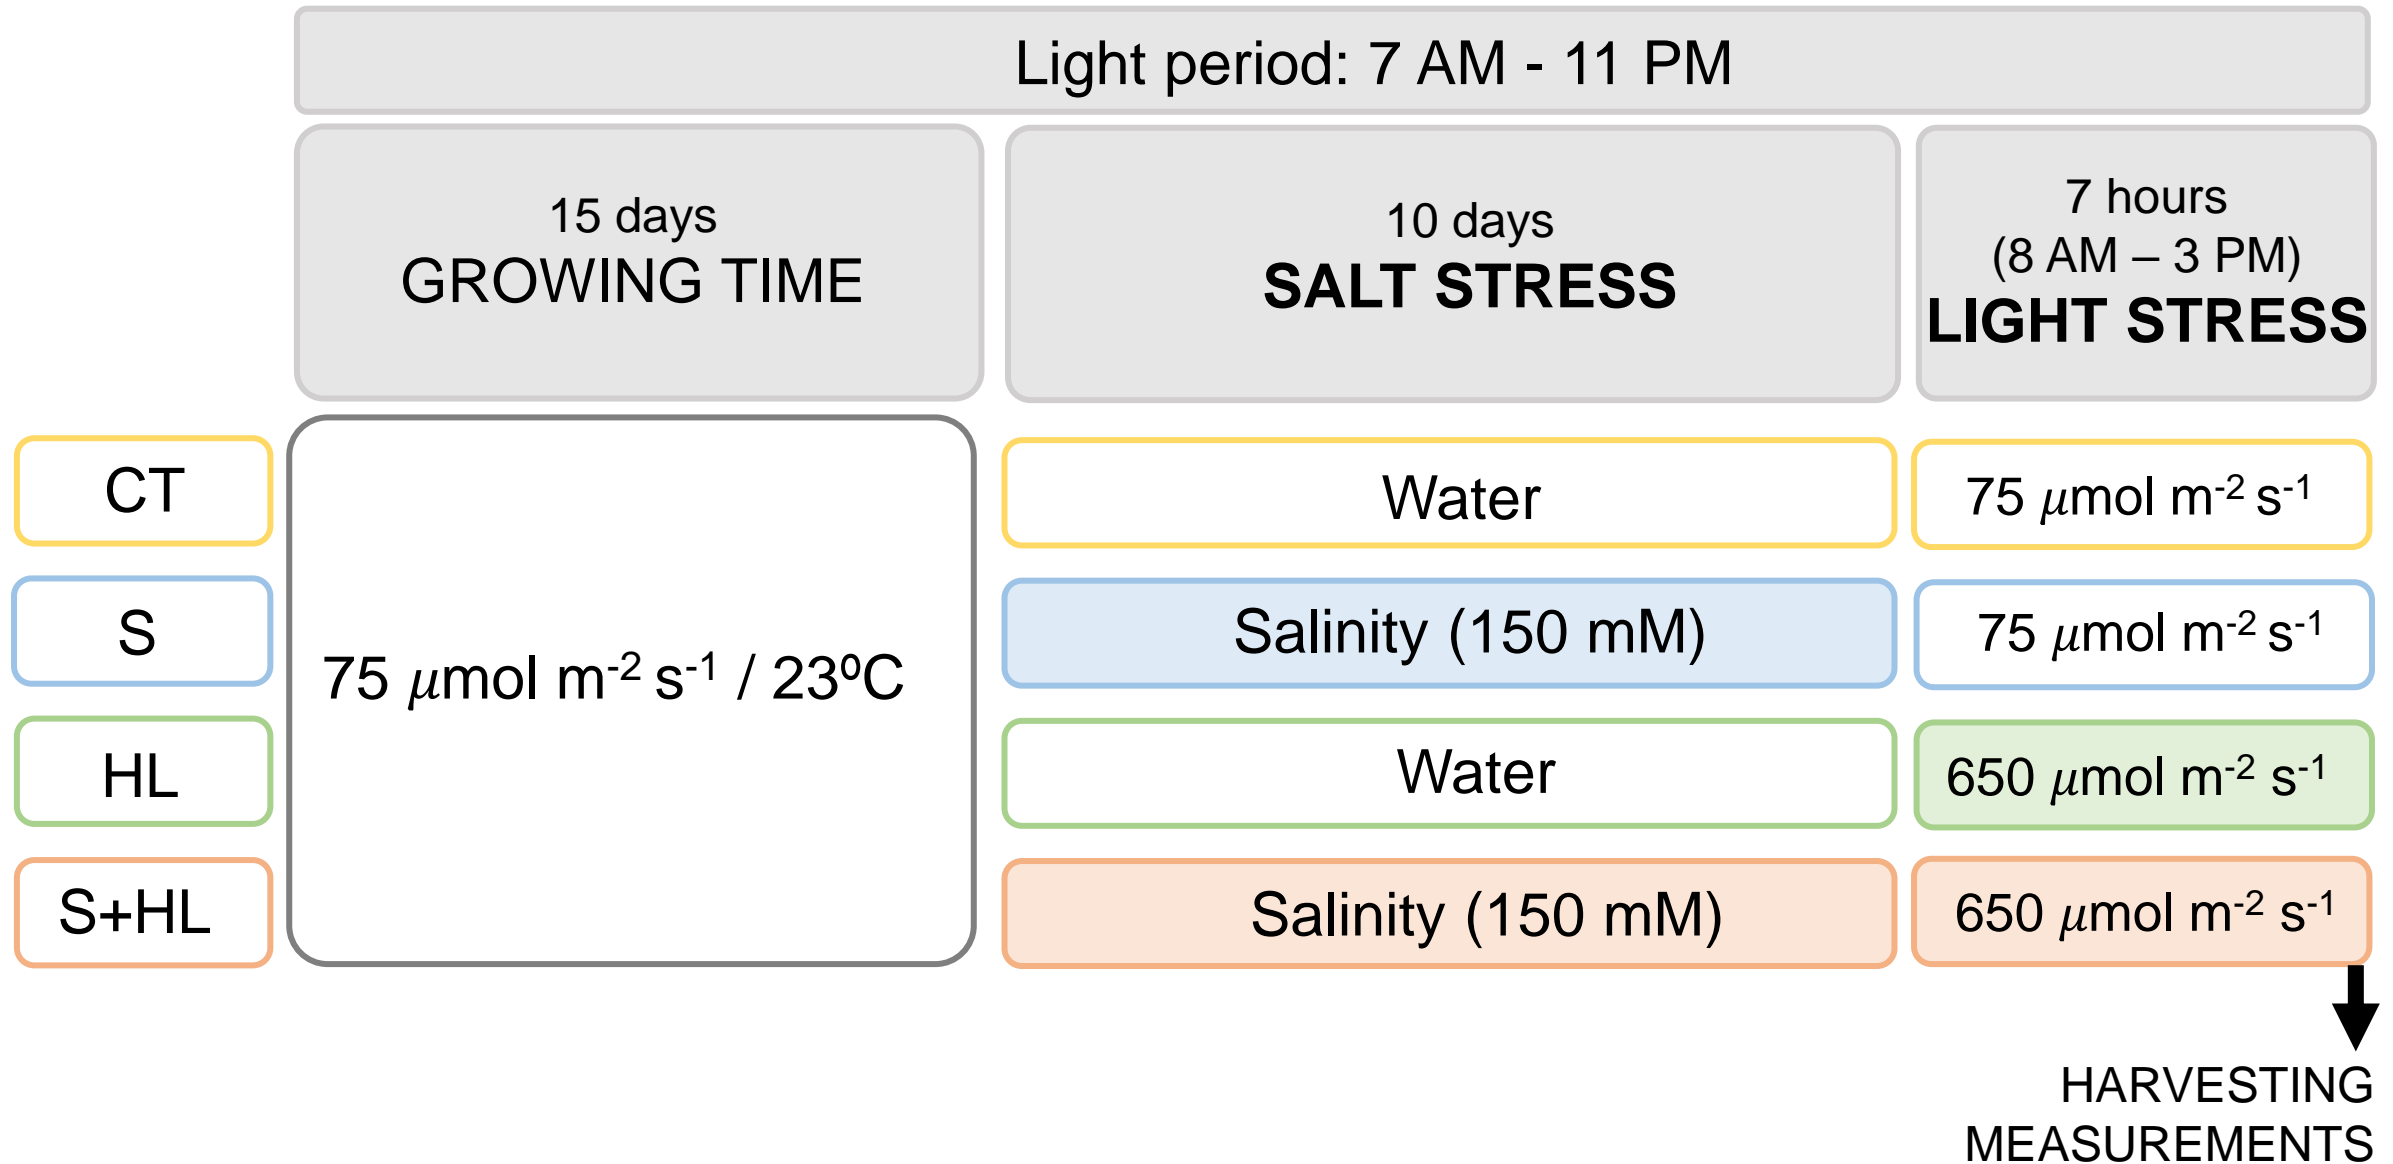

**Fig. S1.** The experimental design used for the metabolomic study of high salinity (S), high irradiance (HL), and a combination of high salinity and high irradiance (S+HL) using *Arabidopsis Col* and *Ler* plants. CT, control; HL, high irradiance; S, high salinity; S+HL, a combination of high salinity and high irradiance.

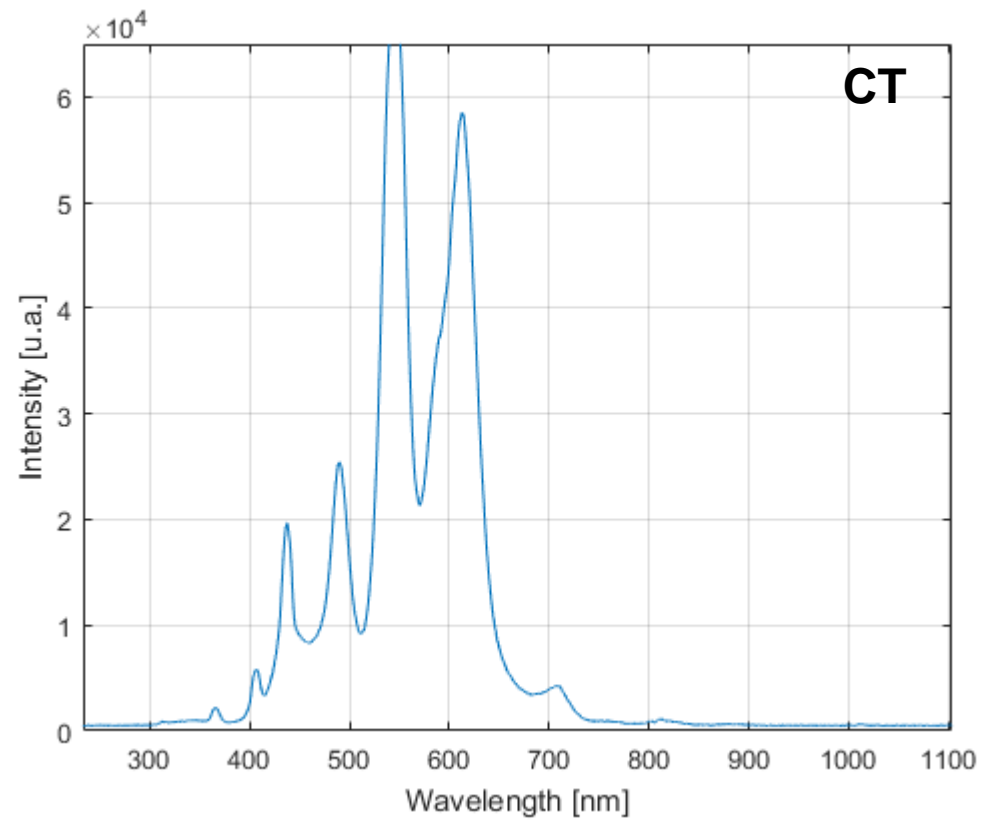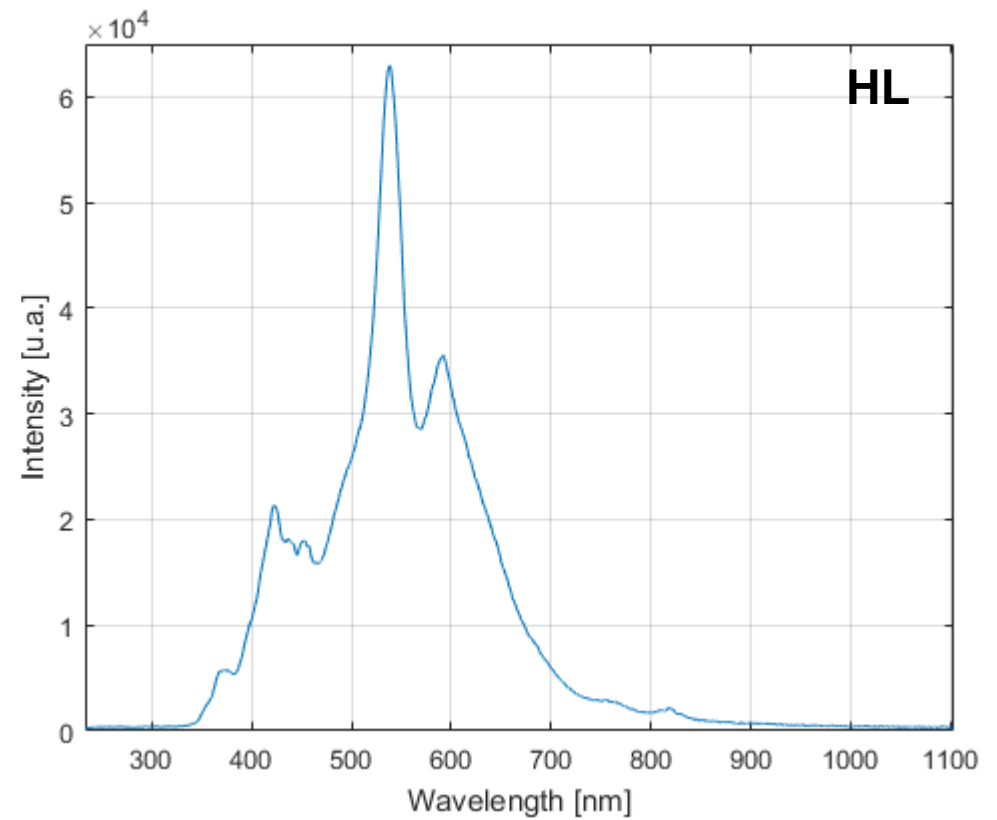

**Fig. S2.** Light spectrum used for growing plants under control conditions and during increased irradiance treatments. CT, control; HL, increased irradiance.

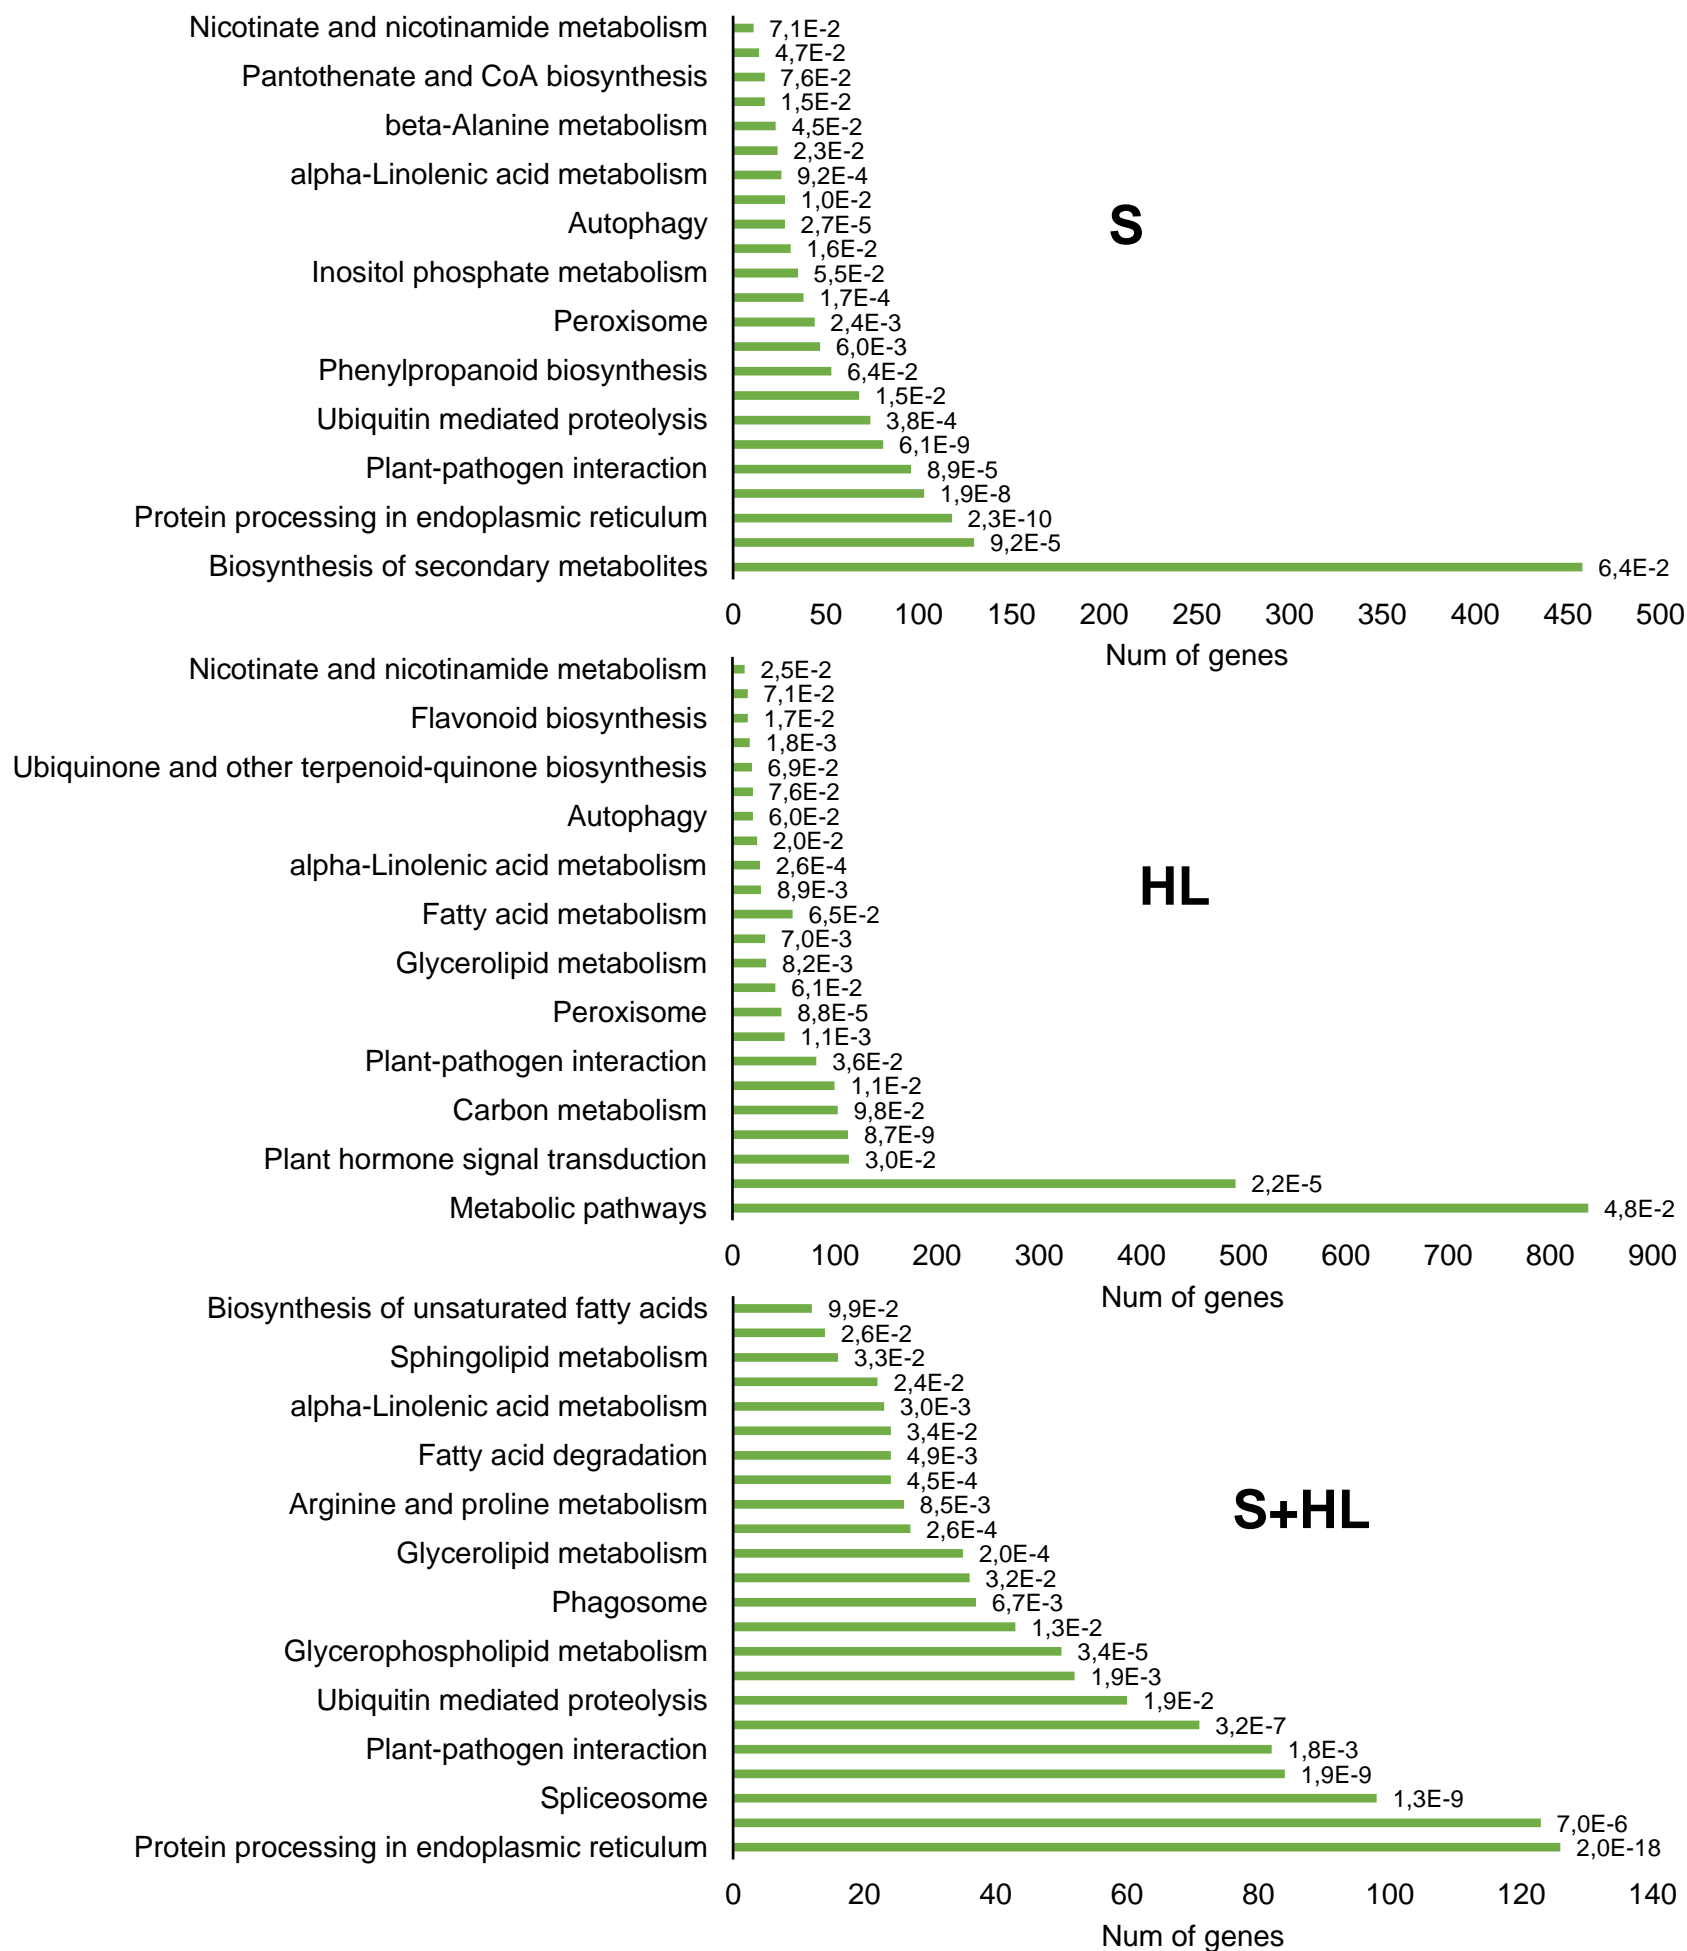

**Fig. S3.** Pathway analysis of transcripts upregulated in response to S, HL, and S+HL using Arabidopsis Col seedlings. Transcriptomic data was obtained from [13]. Numbers in bars depict p-value. HL, increased irradiance; S, high salinity; S+HL, a combination of high salinity and increased irradiance.
